# Supplementary material
Source: publisher figshare collection journal article supplement (https://geolsoc.figshare.com/ndownloader/files/10290603)
Supplement: Supplementary file 1 [file 10290603]

## Sheet: Plan1
Table A1: Representative clinopyroxene mineral analyses for the Mosquito and Sardinha basalts
Sample	BP-30_C8 cpx 3	BP-117_C4 cpx 1	BP-128	BP-35_C4 cpx 2	BP-54_C5 cpx 1 C	BP-35	BP-56A	52_C10 cpx 1	40_C7 cpx 2	56_C2 cpx 1	39_C5 cpx 2	DCO-55	DCO-39	49_C4 cpx 1.5	54_C5 cpx 1	DCO-49
Formation	Mosquito	Mosquito	Mosquito	Mosquito	Mosquito	Mosquito	Mosquito	Sardinha	Sardinha	Sardinha	Sardinha	Sardinha	Sardinha	Sardinha	Sardinha	Sardinha
Group	High-Ti	High-Ti	High-Ti	Low-Ti	Low-Ti	Low-Ti	Low-Ti	Alkali-basalt	Alkali-basalt	High-Ti	High-Ti	High-Ti	High-Ti	Low-Ti ol	Low-Ti ol	Low-Ti ol
Mineral	Augite	Augite	Pigeonite	Augite	Augite	Pigeonite	Pigeonite	Augite	Augite	Augite	Augite	Pigeonite	Pigeonite	Augite	Augite	Pigeonite
SiO2 (wt.%)	51.915	49.354	49.842	53.459	52.788	54.529	54.796	49.741	51.102	51.359	50.577	51.097	51.658	51.662	51.921	52.383
TiO2	0.361	1.349	0.638	0.133	0.451	0.266	0.087	1.314	1.05	0.791	1.089	0.45	0.425	0.7	0.852	0.843
Al2O3	1.997	3.431	0.559	1.516	1.607	0.772	0.694	3.896	3.49	1.76	2.56	0.778	0.765	2.141	1.902	0.523
FeO	10.513	9.867	28.649	8.144	10.1	14.631	14.226	6.849	5.196	14.794	15.453	22.764	23.942	9.824	10.02	20.75
MnO	0.392	0.15	0.641	0.237	0.168	0.393	0.304	0.079	0.299	0.311	0.393	0.725	0.574	0.288	0.323	0.285
MgO	15.748	15.76	14.946	17.772	16.723	25.063	25.864	15.233	16.704	14.508	13.977	18.162	17.369	16.08	16.494	20.606
CaO	18.447	19.068	4.231	17.922	17.281	4.11	3.906	21.863	21.147	16.002	15.353	5.466	5.578	17.822	17.958	3.791
Na2O	0.264	0.288	0.026	0.137	0.769	0.037	0.053	0.527	0.352	0.214	0.277	0.06	0.094	0.412	0.423	0.093
Cr2O3	0.011	0.421	0.114	0.406	0	0.072	0.094	0.174	0.693	0.026	0	0.009	0	0.49	0.125	0.046
V2O3	0.038	0.092	0	0.034	0.095	0.017	0.052	0.039	0.043	0.003	0.118	0.013	0	0.132	0.112	0
NiO	0.082	0.022	0.095	0.013	0	0.049	0.011	0.022	0.058	0.042	0.071	0.044	0.035	0.053	0.027	0.018
Total	99.768	99.802	99.741	99.773	99.982	99.939	100.087	99.737	100.134	99.81	99.868	99.568	100.44	99.604	100.157	99.338
Normalization based on 6 oxigens
Si (atoms%)	1.93134	1.83307	1.94478	1.96763	1.94392	1.98005	1.97811	1.83452	1.8672	1.93977	1.91501	1.9446	1.95918	1.92103	1.9174	1.97224
Al	0.0875536	0.150178	0.025705	0.0657587	0.0697412	0.0330366	0.0295251	0.169339	0.150283	0.0783386	0.114232	0.0348935	0.0341924	0.0938229	0.082777	0.0232061
Mg	0.873406	0.872645	0.869411	0.97518	0.918085	1.35677	1.39195	0.837562	0.909911	0.816893	0.788963	1.03044	0.982058	0.891401	0.908071	1.15661
Ti	0.0101023	0.037689	0.0187259	0.00368232	0.012493	0.00726568	0.00236247	0.0364543	0.0288595	0.0224727	0.0310164	0.0128823	0.0121247	0.0195797	0.0236676	0.023875
Cr	0.000323522	0.0123618	0.00351662	0.0118139	0	0.00206693	0.00268271	0.00507342	0.0200185	0.000776338	0	0.000270784	0	0.0144047	0.00364942	0.00136922
Fe3+	0.0471445	0.0971898	0.0162165	0	0.069524	0	0.00905208	0.120176	0.0612499	0.0119863	0.0104675	0.0333937	0.0234785	0.0363241	0.0584114	0
Fe2+	0.279937	0.192539	0.889135	0.250683	0.241525	0.44431	0.420433	0.0910741	0.0975267	0.455299	0.478854	0.670616	0.729282	0.269178	0.251046	0.653359
Ni	0	0	0	0	0	0	0	0	0	0	0	0	0	0	0	0
Mn	0.0123507	0.00471831	0.0211823	0.00738773	0.00523952	0.0120859	0.00929424	0.00246759	0.00925259	0.00994791	0.0126023	0.0233675	0.0184369	0.00906971	0.0101021	0.00908769
Ca	0.735214	0.758723	0.176864	0.706695	0.681765	0.159887	0.151062	0.86385	0.827798	0.647484	0.622778	0.222857	0.226641	0.709971	0.710475	0.152913
Na	0.0190405	0.0207375	0.00196679	0.00977581	0.0549008	0.0026047	0.00370925	0.0376813	0.0249347	0.0156695	0.0203332	0.00442685	0.00691152	0.0297008	0.0302843	0.0067883
Total	4	3.98	3.97	4	4	4	4	4	4	4	3.99	3.98	3.99	3.99	4	4
En (%)	45.1209	45.0316	43.8844	50.4606	48.0447	69.1888	70.5678	43.7904	47.9788	42.2896	41.5012	52.1001	49.8992	46.7467	47.099	58.9242
